# Supplementary material
Source: PubMed Central journal article supplement (PMC6152901)
Supplement: NIHMS79205-supplement-Supplementary_Tables_and_Figures.pdf [file NIHMS79205-supplement-Supplementary_Tables_and_Figures.pdf]

**Table S.1: Primary care presentation rate (per 100 person-months) from CPRD-linked registrations in intracranial tumour patients aged 0 to 24 years, England, 1989–2006: by tumour location and time from diagnosis.**

| Time from diagnosis (months) | Supratentorial |              | Midline |               | Cerebellum |               | Brainstem |               |
|------------------------------|----------------|--------------|---------|---------------|------------|---------------|-----------|---------------|
|                              | Rate           | 95% CI       | Rate    | 95% CI        | Rate       | 95% CI        | Rate      | 95% CI        |
| <b>Before diagnosis</b>      |                |              |         |               |            |               |           |               |
| 12+ months                   | 6.7            | 5.9 – 7.6    | 1.6     | 1.1 – 2.2     | 1.9        | 1.3 – 2.7     | 1.0       | 0.5 – 1.9     |
| 6–12                         | 12.3           | 8.7 – 17.5   | 10.5    | 6.5 – 16.9    | 4.2        | 1.9 – 9.3     | 4.2       | 1.3 – 12.9    |
| 3–6                          | 29.9           | 21.8 – 40.9  | 18.5    | 11.2 – 30.7   | 0.0        | not estimated | 5.2       | 1.3 – 20.9    |
| 1–3                          | 28.9           | 19.7 – 42.4  | 43.6    | 29.2 – 65.1   | 14.0       | 6.7 – 29.4    | 18.8      | 7.8 – 45.1    |
| 0–1 month                    | 109.4          | 83.2 – 144.0 | 167.1   | 125.5 – 222.4 | 156.0      | 114.0 – 213.5 | 193.6     | 133.7 – 280.4 |
| <b>After diagnosis</b>       |                |              |         |               |            |               |           |               |
| 0–1 month                    | 125.0          | 97.1 – 161.0 | 125.0   | 89.7 – 174.1  | 112.0      | 77.3 – 162.2  | 100.0     | 61.3 – 163.2  |
| 1–3                          | 50.9           | 38.3 – 67.5  | 57.1    | 40.4 – 80.8   | 46.9       | 30.9 – 71.3   | 64.2      | 40.4 – 101.9  |
| 3–6                          | 39.1           | 29.8 – 51.1  | 41.8    | 30.0 – 58.3   | 55.1       | 40.1 – 75.7   | 50.0      | 31.5 – 79.4   |
| 6–12                         | 26.9           | 21.3 – 34.0  | 18.5    | 12.8 – 26.8   | 38.3       | 29.1 – 50.4   | 41.9      | 28.8 – 61.1   |
| 12+ months                   | 22.3           | 20.5 – 24.3  | 16.2    | 14.7 – 17.9   | 15.6       | 13.7 – 17.6   | 14.7      | 11.5 – 18.9   |

| Time from diagnosis (months) | Ventricles |               | Meninges |               | Cranial nerves |              | Other |               |
|------------------------------|------------|---------------|----------|---------------|----------------|--------------|-------|---------------|
|                              | Rate       | 95% CI        | Rate     | 95% CI        | Rate           | 95% CI       | Rate  | 95% CI        |
| <b>Before diagnosis</b>      |            |               |          |               |                |              |       |               |
| 12+ months                   | 4.1        | 1.5 – 10.9    | 1.2      | 0.6 – 2.4     | 2.7            | 1.5 – 4.8    | 2.2   | 1.8 – 2.7     |
| 6–12                         | 8.3        | 1.2 – 59.2    | 0.0      | not estimated | 25.0           | 13.0 – 48.0  | 5.6   | 3.4 – 9.3     |
| 3–6                          | 0.0        | not estimated | 0.0      | not estimated | 16.7           | 5.4 – 51.7   | 11.9  | 7.3 – 19.3    |
| 1–3                          | 50.0       | 12.5 – 199.9  | 30.0     | 9.7 – 93.0    | 7.5            | 1.1 – 53.1   | 25.1  | 16.7 – 37.7   |
| 0–1 month                    | 150.0      | 48.4 – 465.1  | 100.0    | 41.6 – 240.3  | 71.4           | 29.7 – 171.6 | 176.3 | 142.2 – 218.7 |
| <b>After diagnosis</b>       |            |               |          |               |                |              |       |               |
| 0–1 month                    | 100.0      | 25.0 – 399.8  | 60.0     | 19.4 – 186.0  | 28.6           | 7.1 – 114.2  | 122.7 | 94.0 – 160.2  |
| 1–3                          | 25.0       | 3.5 – 177.5   | 10.0     | 1.4 – 71.0    | 35.7           | 14.9 – 85.8  | 39.5  | 27.9 – 55.8   |
| 3–6                          | 0.0        | not estimated | 13.3     | 3.3 – 53.3    | 4.8            | 0.7 – 33.8   | 42.3  | 31.9 – 55.9   |
| 6–12                         | 0.0        | not estimated | 20.0     | 9.0 – 44.5    | 2.4            | 0.3 – 16.9   | 28.5  | 22.2 – 36.5   |
| 12+ months                   | 13.9       | 9.9 – 19.6    | 10.0     | 7.5 – 13.2    | 20.1           | 17.1 – 23.5  | 17.7  | 16.4 – 19.2   |

CPRD = Clinical Practice Research Datalink.

**Table S.2: Hospital presentation rate (per 100 person-months) from HES-linked registrations in intracranial tumour patients aged 0 to 24 years, England, 1997–2006: by tumour location and time from diagnosis.**

| Time from diagnosis (months) | Supratentorial |               | Midline |               | Cerebellum |               | Brainstem |               |
|------------------------------|----------------|---------------|---------|---------------|------------|---------------|-----------|---------------|
|                              | Rate           | 95% CI        | Rate    | 95% CI        | Rate       | 95% CI        | Rate      | 95% CI        |
| <b>Before diagnosis</b>      |                |               |         |               |            |               |           |               |
| 12+ months                   | 0.6            | 0.5 – 0.7     | 0.3     | 0.2 – 0.3     | 0.1        | 0.1 – 0.2     | 0.2       | 0.1 – 0.3     |
| 6–12                         | 2.4            | 2.0 – 2.8     | 1.4     | 1.0 – 2.0     | 0.5        | 0.3 – 0.9     | 0.2       | 0.1 – 0.5     |
| 3–6                          | 3.8            | 3.2 – 4.6     | 2.8     | 2.0 – 4.0     | 1.0        | 0.6 – 1.6     | 1.0       | 0.6 – 1.9     |
| 1–3                          | 7.4            | 6.3 – 8.7     | 10.3    | 8.3 – 12.8    | 2.1        | 1.4 – 3.1     | 6.4       | 4.8 – 8.6     |
| 0–1 month                    | 132.1          | 125.2 – 139.4 | 114.1   | 104.2 – 125.0 | 151.8      | 142.1 – 162.1 | 137.6     | 126.0 – 150.3 |
| <b>After diagnosis</b>       |                |               |         |               |            |               |           |               |
| 0–1 month                    | 102.4          | 96.3 – 108.9  | 84.6    | 76.1 – 94.1   | 118.4      | 109.9 – 127.6 | 159.1     | 146.4 – 173.0 |
| 1–3                          | 92.7           | 88.6 – 97.1   | 81.2    | 75.2 – 87.6   | 183.8      | 176.1 – 191.9 | 129.2     | 120.7 – 138.2 |
| 3–6                          | 62.3           | 59.4 – 65.2   | 53.7    | 49.7 – 58.0   | 125.4      | 120.1 – 130.9 | 66.5      | 61.4 – 72.1   |
| 6–12                         | 46.3           | 44.5 – 48.1   | 28.5    | 26.4 – 30.7   | 91.3       | 88.1 – 94.7   | 59.4      | 55.5 – 63.5   |
| 12+ months                   | 16.1           | 15.7 – 16.5   | 5.9     | 5.5 – 6.2     | 14.2       | 13.8 – 14.7   | 17.0      | 16.1 – 18.0   |

| Time from diagnosis (months) | Ventricles |               | Meninges |               | Cranial nerves |             | Other |               |
|------------------------------|------------|---------------|----------|---------------|----------------|-------------|-------|---------------|
|                              | Rate       | 95% CI        | Rate     | 95% CI        | Rate           | 95% CI      | Rate  | 95% CI        |
| <b>Before diagnosis</b>      |            |               |          |               |                |             |       |               |
| 12+ months                   | 1.5        | 1.1 – 2.0     | 0.3      | 0.2 – 0.5     | 0.2            | 0.1 – 0.3   | 0.4   | 0.3 – 0.4     |
| 6–12                         | 1.0        | 0.4 – 2.5     | 1.3      | 0.7 – 2.7     | 0.8            | 0.4 – 1.8   | 1.0   | 0.8 – 1.3     |
| 3–6                          | 2.6        | 1.3 – 5.6     | 2.3      | 1.1 – 4.8     | 1.8            | 0.9 – 3.8   | 2.4   | 1.9 – 2.9     |
| 1–3                          | 10.4       | 6.7 – 16.4    | 4.4      | 2.3 – 8.4     | 4.9            | 2.9 – 8.5   | 6.2   | 5.3 – 7.3     |
| 0–1 month                    | 160.6      | 136.8 – 188.5 | 123.3    | 103.6 – 146.7 | 82.1           | 68.1 – 99.0 | 137.0 | 130.7 – 143.7 |
| <b>After diagnosis</b>       |            |               |          |               |                |             |       |               |
| 0–1 month                    | 90.6       | 73.0 – 112.5  | 31.2     | 22.0 – 44.1   | 23.3           | 16.4 – 33.2 | 95.1  | 89.8 – 100.8  |
| 1–3                          | 135.0      | 119.0 – 153.1 | 16.2     | 11.5 – 22.8   | 15.2           | 11.1 – 20.7 | 105.3 | 101.2 – 109.5 |
| 3–6                          | 90.0       | 79.2 – 102.3  | 16.0     | 12.1 – 21.2   | 9.1            | 6.6 – 12.6  | 73.8  | 71.0 – 76.7   |
| 6–12                         | 68.6       | 61.6 – 76.3   | 12.2     | 9.7 – 15.3    | 7.5            | 5.8 – 9.6   | 60.7  | 58.8 – 62.6   |
| 12+ months                   | 18.8       | 17.6 – 20.1   | 4.2      | 3.6 – 4.8     | 3.0            | 2.7 – 3.5   | 15.6  | 15.2 – 15.9   |

HES = Hospital Episode Statistics.

**Table S.3: Emergency presentation rate (per 100 person-months) from HES-linked registrations in intracranial tumour patients aged 0 to 24 years, England, 1997–2006: by tumour location and time from diagnosis.**

| Time from diagnosis (months) | Supratentorial |             | Midline |             | Cerebellum |              | Brainstem |             |
|------------------------------|----------------|-------------|---------|-------------|------------|--------------|-----------|-------------|
|                              | Rate           | 95% CI      | Rate    | 95% CI      | Rate       | 95% CI       | Rate      | 95% CI      |
| <b>Before diagnosis</b>      |                |             |         |             |            |              |           |             |
| 12+ months                   | 0.2            | 0.2 – 0.2   | 0.1     | 0.1 – 0.2   | 0.1        | 0.1 – 0.1    | 0.1       | 0.0 – 0.1   |
| 6–12                         | 1.0            | 0.7 – 1.3   | 0.6     | 0.4 – 1.1   | 0.4        | 0.3 – 0.7    | 0.1       | 0.0 – 0.4   |
| 3–6                          | 1.9            | 1.5 – 2.5   | 0.9     | 0.5 – 1.7   | 0.9        | 0.5 – 1.5    | 0.9       | 0.4 – 1.6   |
| 1–3                          | 4.3            | 3.4 – 5.3   | 4.2     | 3.0 – 5.8   | 1.2        | 0.7 – 2.0    | 2.9       | 1.9 – 4.5   |
| 0–1 month                    | 66.8           | 62.0 – 72.1 | 54.8    | 48.0 – 62.4 | 96.3       | 88.7 – 104.6 | 86.2      | 77.1 – 96.3 |
| <b>After diagnosis</b>       |                |             |         |             |            |              |           |             |
| 0–1 month                    | 21.9           | 19.1 – 25.0 | 22.4    | 18.2 – 27.5 | 38.5       | 33.7 – 43.9  | 41.1      | 34.9 – 48.4 |
| 1–3                          | 15.2           | 13.5 – 17.0 | 14.2    | 11.8 – 17.0 | 26.8       | 24.0 – 30.0  | 19.7      | 16.6 – 23.4 |
| 3–6                          | 10.5           | 9.4 – 11.8  | 11.1    | 9.4 – 13.2  | 16.5       | 14.6 – 18.5  | 13.8      | 11.6 – 16.5 |
| 6–12                         | 8.2            | 7.4 – 9.0   | 4.8     | 4.0 – 5.8   | 11.8       | 10.7 – 13.1  | 11.2      | 9.6 – 13.1  |
| 12+ months                   | 3.0            | 2.8 – 3.2   | 1.3     | 1.2 – 1.5   | 2.0        | 1.9 – 2.2    | 2.9       | 2.6 – 3.3   |

| Time from diagnosis (months) | Ventricles |              | Meninges |             | Cranial nerves |             | Other |             |
|------------------------------|------------|--------------|----------|-------------|----------------|-------------|-------|-------------|
|                              | Rate       | 95% CI       | Rate     | 95% CI      | Rate           | 95% CI      | Rate  | 95% CI      |
| <b>Before diagnosis</b>      |            |              |          |             |                |             |       |             |
| 12+ months                   | 0.5        | 0.3 – 0.8    | 0.2      | 0.1 – 0.3   | 0.1            | 0.0 – 0.2   | 0.1   | 0.1 – 0.2   |
| 6–12                         | 0.2        | 0.0 – 1.5    | 0.8      | 0.4 – 2.0   | 0.3            | 0.1 – 1.1   | 0.5   | 0.3 – 0.7   |
| 3–6                          | 1.1        | 0.4 – 3.5    | 1.6      | 0.7 – 3.9   | 1.0            | 0.4 – 2.7   | 1.3   | 1.0 – 1.8   |
| 1–3                          | 2.2        | 0.8 – 5.9    | 1.9      | 0.7 – 5.2   | 2.7            | 1.3 – 5.6   | 3.7   | 3.0 – 4.5   |
| 0–1 month                    | 88.4       | 71.2 – 109.7 | 49.5     | 37.6 – 65.2 | 19.4           | 13.2 – 28.5 | 75.9  | 71.2 – 80.9 |
| <b>After diagnosis</b>       |            |              |          |             |                |             |       |             |
| 0–1 month                    | 24.3       | 16.0 – 36.9  | 11.7     | 6.6 – 20.6  | 9.8            | 5.7 – 16.9  | 28.6  | 25.7 – 31.8 |
| 1–3                          | 21.1       | 15.4 – 29.0  | 5.9      | 3.3 – 10.4  | 3.0            | 1.5 – 6.1   | 18.7  | 17.0 – 20.5 |
| 3–6                          | 16.9       | 12.6 – 22.7  | 4.3      | 2.5 – 7.3   | 1.5            | 0.7 – 3.4   | 13.3  | 12.2 – 14.6 |
| 6–12                         | 10.7       | 8.2 – 14.1   | 3.3      | 2.1 – 5.1   | 1.3            | 0.7 – 2.3   | 10.4  | 9.6 – 11.2  |
| 12+ months                   | 3.6        | 3.1 – 4.2    | 2.0      | 1.6 – 2.4   | 0.5            | 0.3 – 0.7   | 2.9   | 2.7 – 3.0   |

HES = Hospital Episode Statistics.

# Supplementary materials

## Figures

- Figures represent temporal change in presentation rate in children and young adults with intracranial tumour, by anatomical location, before and after diagnosis (time = 0 at brain tumour diagnosis) in England.
- Left column: primary care presentations (1989–2006)
  - grey dots: observed rates
  - black line: predicted rates after locally weighted regression (LOESS) smoothing
- Right column: hospital presentations (1997–2006)
  - black dots: observed rates of all admissions
  - red dots: observed rates of emergency admissions only
  - black line: predicted rates of all admissions after LOESS smoothing
  - red line: predicted rates of emergency admissions after LOESS smoothing

Figure S.1

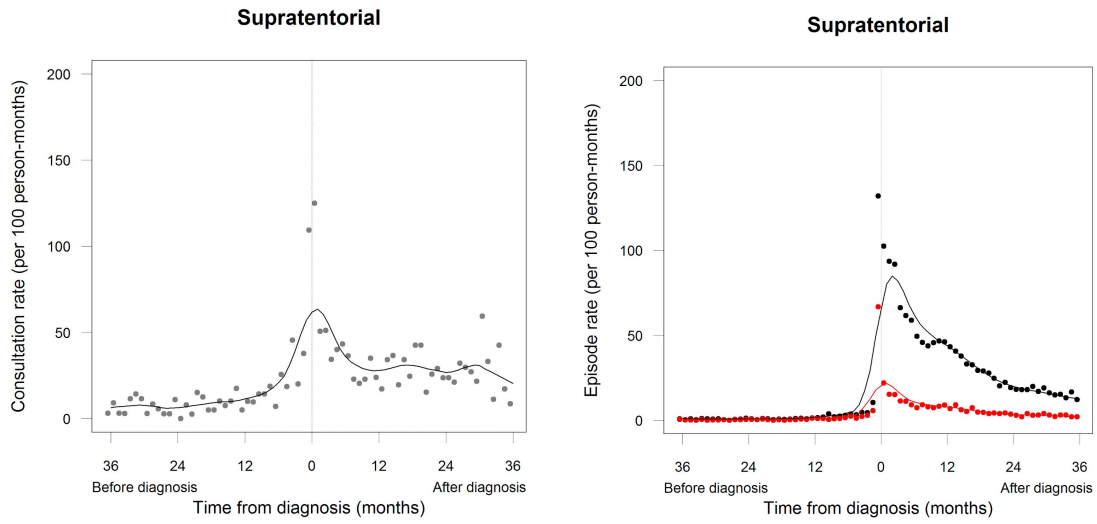

Figure S.2

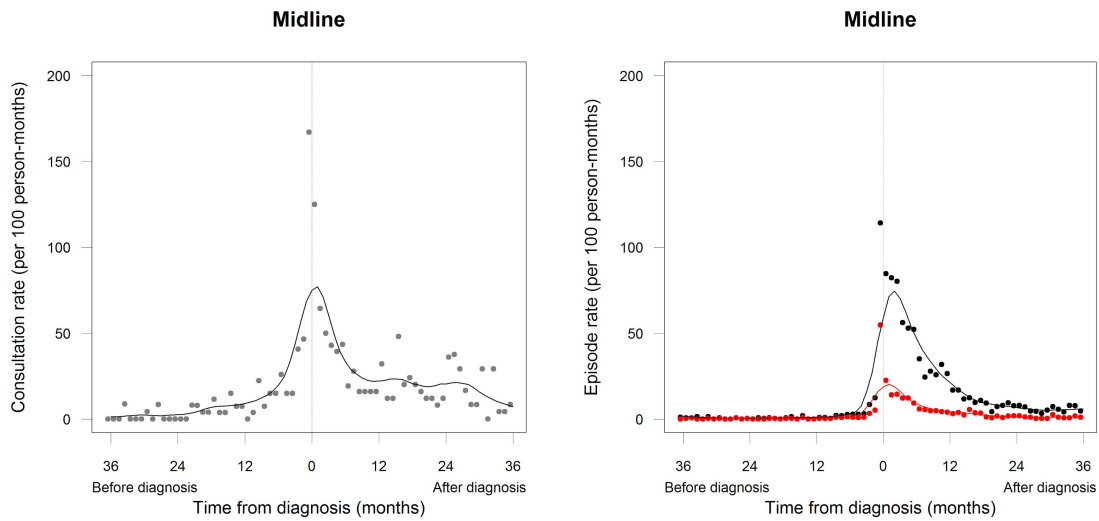

Chu TPC, Shah A, Walker D, Coleman MP. Where are the opportunities for an earlier diagnosis of primary intracranial tumours in children and young adults? *Eur J Paediatr Neurol* 2016.

<https://dx.doi.org/10.1016/j.ejpn.2016.10.010>

Figure S.3

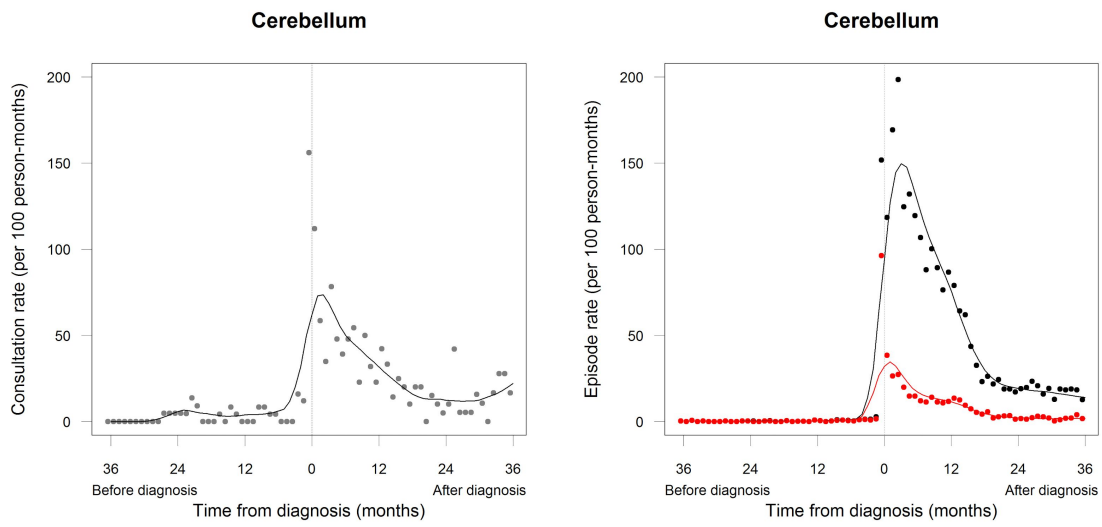

Figure S.4

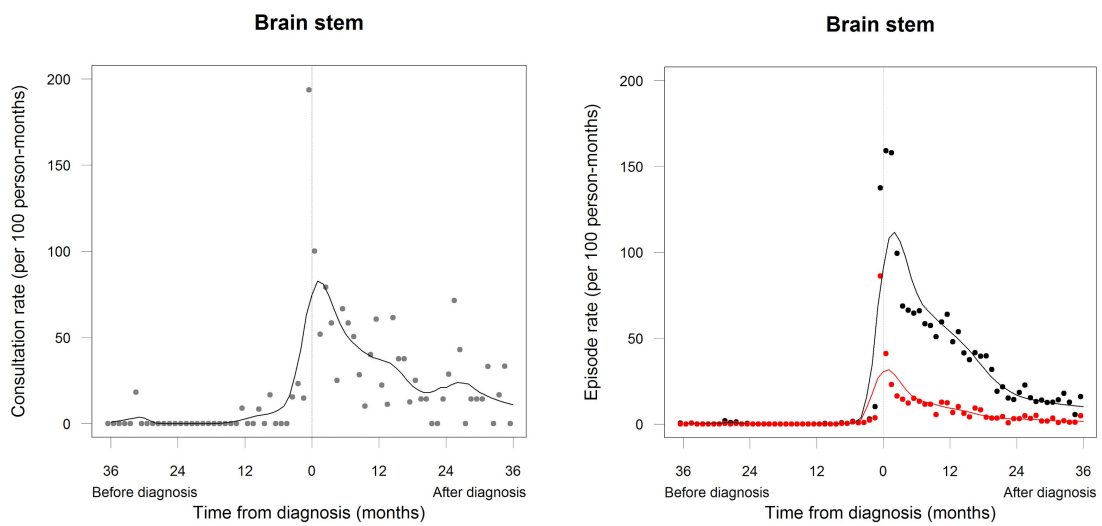

Figure S.5

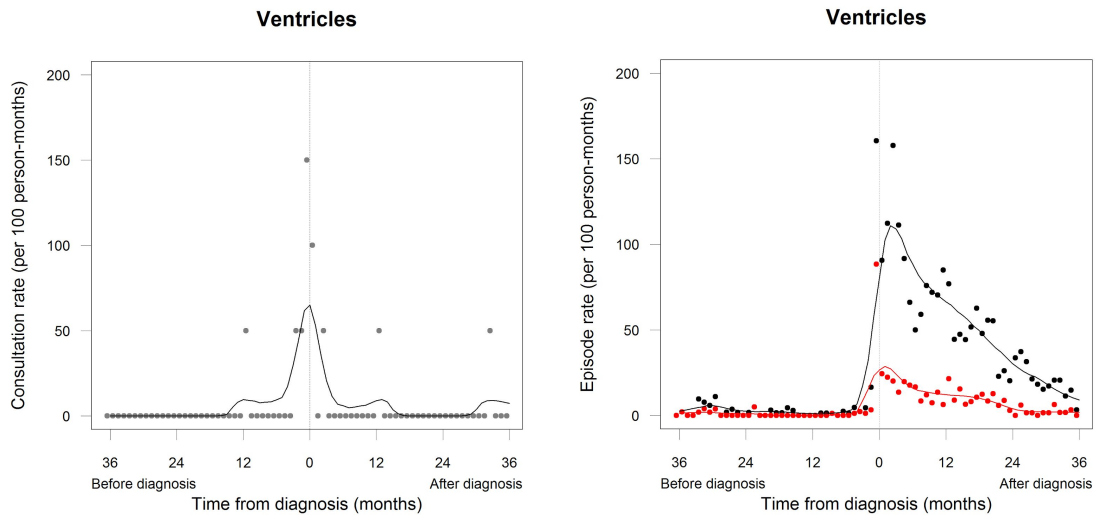

Figure S.6

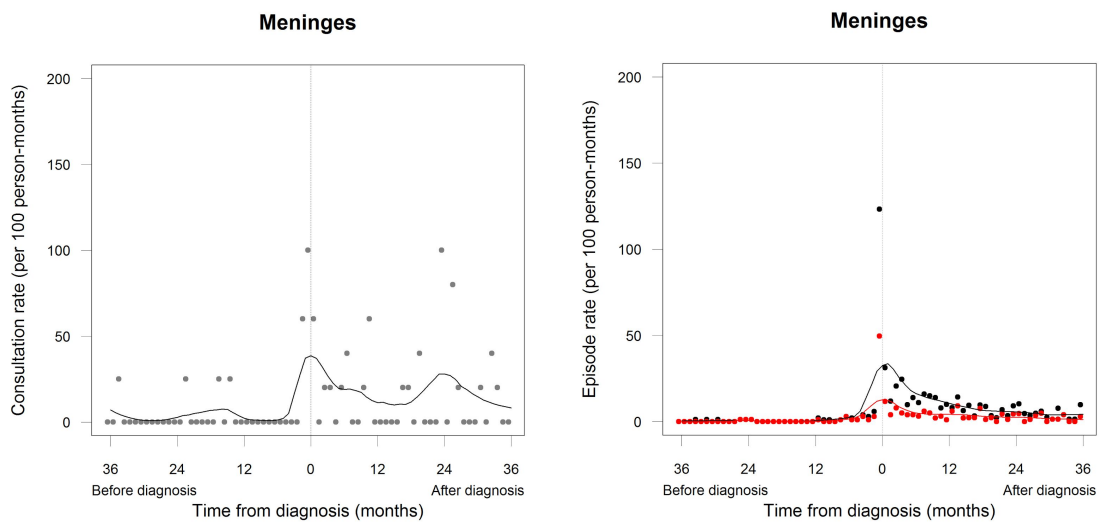

Chu TPC, Shah A, Walker D, Coleman MP. Where are the opportunities for an earlier diagnosis of primary intracranial tumours in children and young adults? *Eur J Paediatr Neurol* 2016.

<https://dx.doi.org/10.1016/j.ejpn.2016.10.010>

Figure S.7

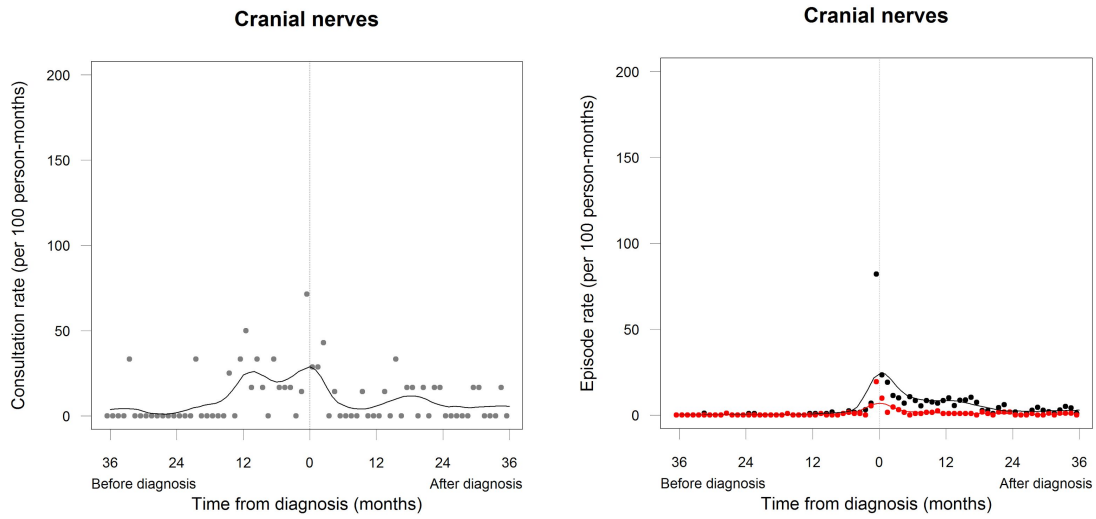

Figure S.8

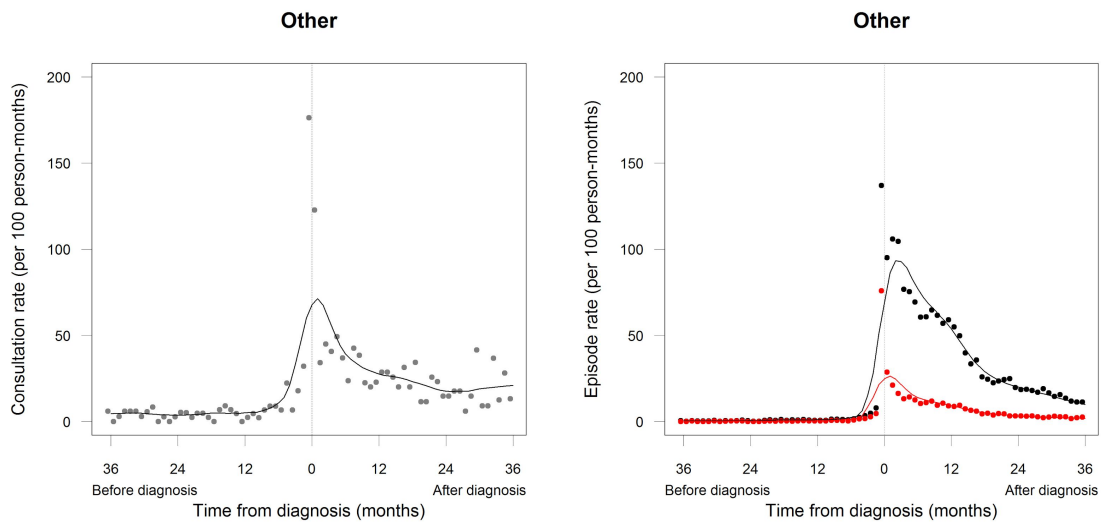

Chu TPC, Shah A, Walker D, Coleman MP. Where are the opportunities for an earlier diagnosis of primary intracranial tumours in children and young adults? *Eur J Paediatr Neurol* 2016.

<https://dx.doi.org/10.1016/j.ejpn.2016.10.010>
